# Supplementary material for: The Significance of Thyroid Hormone Receptors in Breast Cancer: A Hypothesis-Generating Narrative Review
Source: MDPI journal article supplement (doi:10.3390/curroncol31050176), 2024-04-23
Supplement: s1 [file s1]

**Table S1:** Ovid search

| Ovid<br>Medline<br>search |                                                                                                                                                                                                                                                                                                                                     |
|---------------------------|-------------------------------------------------------------------------------------------------------------------------------------------------------------------------------------------------------------------------------------------------------------------------------------------------------------------------------------|
| 1                         | exp Breast Neoplasms/                                                                                                                                                                                                                                                                                                               |
| 2                         | ((breast adj3 cancer*) or (breast adj3 carcinoma*) or (breast adj3 neoplasm*) or breast malignant neoplasm* or breast malignant tumor* or breast neoplasm*).mp.                                                                                                                                                                     |
| 3                         | ((breast adj3 tumor*) or cancer, breast or cancer of breast or cancer of the breast or human mammary carcinoma* or neoplasm, human mammary or neoplasms, human mammary).mp                                                                                                                                                          |
| 4                         | or/1-3                                                                                                                                                                                                                                                                                                                              |
| 5                         | exp Thyroid Hormone Receptors alpha/                                                                                                                                                                                                                                                                                                |
| 6                         | exp Thyroid Hormone Receptors beta/                                                                                                                                                                                                                                                                                                 |
| 7                         | (THRA* or THR alpha* or TRalpha*).mp.                                                                                                                                                                                                                                                                                               |
| 8                         | (THRB* or THR beta* or TRbeta*).mp.                                                                                                                                                                                                                                                                                                 |
| 9                         | (ERBA1 Gene Product* or NR1A1 Gene Product* or Proto-Oncogene Protein* c-erbA or Receptor* alpha, Thyroid Hormone or THRA Gene Product* or Thyroid Hormone Receptor alpha-1* or Thyroid Hormone Receptor alpha-2* or c-erb A Protein* or c-erbA Protein* or c-erbA alpha* or c-erbA-1 Protein* or erbA Proto-Oncogene Product*).mp. |
| 10                        | (ERBA2 Gene Product* or NR1A2 Gene Product* or Receptor* beta Thyroid Hormone or THRB Gene Product* or TR beta* or Thyroid Hormone Receptor beta* or Thyroid Hormone Receptor beta-1* or Thyroid Hormone Receptor beta-2* or c-erbA beta*).mp.                                                                                      |
| 11                        | or/5-10                                                                                                                                                                                                                                                                                                                             |
| 12                        | 4 and 11                                                                                                                                                                                                                                                                                                                            |

| Ovid<br>Embase<br>search |                                                                                                                                                                                                                                                                                                                                     |
|--------------------------|-------------------------------------------------------------------------------------------------------------------------------------------------------------------------------------------------------------------------------------------------------------------------------------------------------------------------------------|
| 1                        | exp breast tumor/                                                                                                                                                                                                                                                                                                                   |
| 2                        | ((breast adj3 cancer*) or (breast adj3 carcinoma*) or (breast adj3 neoplasm*) or breast malignant neoplasm* or breast malignant tumor* or breast neoplasm*).mp.                                                                                                                                                                     |
| 3                        | ((breast adj3 tumor*) or cancer, breast or cancer of breast or cancer of the breast or human mammary carcinoma* or neoplasm, human mammary or neoplasms, human mammary).mp.                                                                                                                                                         |
| 4                        | or/1-3                                                                                                                                                                                                                                                                                                                              |
| 5                        | exp thyroid hormone receptor alpha/                                                                                                                                                                                                                                                                                                 |
| 6                        | exp thyroid hormone receptor beta/                                                                                                                                                                                                                                                                                                  |
| 7                        | (THRA* or THR alpha* or TRalpha*).mp.                                                                                                                                                                                                                                                                                               |
| 8                        | (THRB* or THR beta* or TRbeta*).mp.                                                                                                                                                                                                                                                                                                 |
| 9                        | (ERBA1 Gene Product* or NR1A1 Gene Product* or Proto-Oncogene Protein* c-erbA or Receptor* alpha, Thyroid Hormone or THRA Gene Product* or Thyroid Hormone Receptor alpha-1* or Thyroid Hormone Receptor alpha-2* or c-erb A Protein* or c-erbA Protein* or c-erbA alpha* or c-erbA-1 Protein* or erbA Proto-Oncogene Product*).mp. |
| 10                       | (ERBA2 Gene Product* or NR1A2 Gene Product* or Receptor* beta Thyroid Hormone or THRB Gene Product* or TR beta* or Thyroid Hormone Receptor beta* or Thyroid Hormone Receptor beta-1* or Thyroid Hormone Receptor beta-2* or c-erbA beta*).mp.                                                                                      |
| 11                       | 5 or 6 or 7 or 8 or 9 or 10                                                                                                                                                                                                                                                                                                         |
| 12                       | 4 and 11                                                                                                                                                                                                                                                                                                                            |
